# Supplementary material for: Monitoring of Cardiorespiratory Parameters in Rats—Validation Based on Pharmacological Stimulation
Source: MDPI journal article supplement (doi:10.3390/ph14121223), 2021-11-25
Supplement: s1 [file s1]

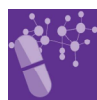

# Monitoring of Cardiorespiratory Parameters in Rats – Validation Based on Pharmacological Stimulation

Joanna Miklosz <sup>1\*</sup>, Bartłomiej Kalaska <sup>1</sup>, Stanisław Zajackowski <sup>2</sup>, Dariusz Pawlak <sup>1</sup> and Andrzej Mogielnicki <sup>1</sup>

<sup>1</sup> Department of Pharmacodynamics, Medical University of Białystok, 15-089 Białystok, Poland; bartlomiej.kalaska@umb.edu.pl; dariusz.pawlak@umb.edu.pl; andrzej.mogielnicki@umb.edu.pl

<sup>2</sup> Department of Physiology, Medical University of Gdańsk, 80-211 Gdańsk, Poland; stanislaw.zajackowski@gumed.edu.pl

\* Correspondence: joanmiklosz@gmail.com; Tel.: +48-85-748-5231

**Table S1.** The values of tested parameters at 0 minute of the experiment carried out with the use of two methods simultaneously.

| Parameters                     | Vehicle                | Adrenaline dose        |                       |                        | Nitroglycerin dose     |                        |                        |
|--------------------------------|------------------------|------------------------|-----------------------|------------------------|------------------------|------------------------|------------------------|
|                                |                        | low                    | medium                | high                   | low                    | medium                 | high                   |
| Systolic blood pressure (bpm)  | 126.2<br>(110.5-141.1) | 125.3<br>(115.7-148.6) | 120.2<br>(90.3-148.3) | 119.5<br>(102.2-127.3) | 114.2<br>(108.0-120.3) | 127.4<br>(105.1-141.2) | 118.8<br>(112.2-127.1) |
| Diastolic blood pressure (bpm) | 118.4<br>(110.0-135.2) | 121.1<br>(110.8-139.9) | 115.6<br>(86.8-140.9) | 113.7<br>(98.6-122.9)  | 107.7<br>(100.5-113.2) | 120.5<br>(99.0-134.2)  | 114.7<br>(108.7-119.5) |
| Mean blood pressure (bpm)      | 122.3<br>(110.2-138.0) | 123.4<br>(113.6-144.3) | 117.7<br>(88.6-144.6) | 118.6<br>(100.3-125.2) | 111.3<br>(104.4-116.8) | 124.1<br>(101.9-137.9) | 116.8<br>(110.9-123.8) |
| Blood perfusion (%)            | 0.08<br>(0.04-0.19)    | 0.07<br>(0.06-0.11)    | 0.05<br>(0.04-0.09)   | 0.05<br>(0.02-0.08)    | 0.04<br>(0.02-0.08)    | 0.05<br>(0.03-0.06)    | 0.05<br>(0.04-0.06)    |
| Heart rate (bpm)               | 439<br>(382-487)       | 405<br>(379-473)       | 411<br>(340-457)      | 374<br>(347-391)       | 395<br>(379-410)       | 417<br>(367-457)       | 379<br>(321-412)       |
| Blood oxygen saturation (%)    | 85<br>(72-94)          | 82<br>(62-84)          | 79<br>(64-81)         | 80<br>(69-85)          | 83<br>(74-89)          | 82<br>(78-88)          | 86<br>(82-88)          |
| Respiratory rate (bpm)         | 72<br>(42-88)          | 65<br>(59-77)          | 60<br>(51-76)         | 64<br>(56-71)          | 52<br>(41-65)          | 66<br>(50-74)          | 56<br>(45-65)          |
| Peak CO <sub>2</sub> (%)       | 4.2<br>(3.6-4.3)       | 4.3<br>(3.7-4.7)       | 3.8<br>(3.5-4.2)      | 3.9<br>(3.7-4.0)       | 4.3<br>(3.9-5.2)       | 4.1<br>(3.7-4.5)       | 4.1<br>(3.8-4.7)       |

Data are median with range (n = 5–8).

**Table S2.** Change of blood pressure in anaesthetized rats after administration of drugs measured by Plugsys (Transonics System) separately.

| T (min)                                  | Adrenaline 5 µg/kg            | Nitroglycerin 10 µg/kg            |
|------------------------------------------|-------------------------------|-----------------------------------|
| <b>Δ Systolic blood pressure (mmHg)</b>  |                               |                                   |
| 0.5                                      | 38.7±14.3 <sup>c</sup>        | -57.7±7.6 <sup>c</sup>            |
| 1                                        | 31.7 (3.9–49.3) <sup>a</sup>  | -46.9 (-57.7– -21.5) <sup>b</sup> |
| 2                                        | -7.8±10.5                     | -25.9 (-47.3– -6.9) <sup>b</sup>  |
| 3                                        | -6.6±6.6                      | -13.6±13.8                        |
| 10                                       | 4.1±8.3                       | 1.2±10.4                          |
| 30                                       | 3.9±8.6                       | -1.4±10.0                         |
| 60                                       | 3.2±8.6                       | -4.6±7.1                          |
| <b>Δ Diastolic blood pressure (mmHg)</b> |                               |                                   |
| 0.5                                      | 31.1 (12.0–60.1) <sup>b</sup> | -56.7±6.6 <sup>c</sup>            |
| 1                                        | 28.20 (2.6–49.2) <sup>a</sup> | -45.5 (-52.7– -23.1) <sup>b</sup> |
| 2                                        | -7.5±9.9                      | -21.3±13.9 <sup>b</sup>           |
| 3                                        | -6.6±6.0                      | -11.8±12.1                        |
| 10                                       | 4.4±7.1                       | 3.2±7.1                           |
| 30                                       | 4.9±8.3                       | -0.2±6.2                          |
| 60                                       | 3.3 (-6.0– 17.4)              | -2.6 (-10.0– -0.7)                |
| <b>Δ Mean blood pressure (mmHg)</b>      |                               |                                   |
| 0.5                                      | 36.6±15.9 <sup>b</sup>        | -57.2±6.2 <sup>c</sup>            |
| 1                                        | 30.2 (3.3–49.2) <sup>a</sup>  | -46.6 (-55.4– -22.3) <sup>b</sup> |
| 2                                        | -7.7±10.2                     | -23.6 (-44.8– -8.4) <sup>b</sup>  |
| 3                                        | -6.6±6.3                      | -12.6±13.0                        |
| 10                                       | 4.1±7.9                       | 2.2±8.8                           |
| 30                                       | 4.3±8.4                       | -0.8±8.2                          |
| 60                                       | 3.7±8.5                       | -4.0±5.3                          |

Data are median with range or mean ± SD (n = 5). Δ indicates the change in relation to the value at the 0 minute of the experiment in the test group; T, time and min, minute.

<sup>a</sup>P<0.05, <sup>b</sup>P<0.01, <sup>c</sup>P<0.001 vs vehicle with Mann–Whitney test or the unpaired Student's t-test.

**Table S3.** Change of blood perfusion, heart rate and blood oxygen saturation in anaesthetized rats after administration of drugs measured by the PhysioSuite Physiological Monitoring Modular System (Kent Scientific Corporation) separately.

| T (min)                              | Adrenaline 5 µg/kg             | Nitroglycerin 10 µg/kg        |
|--------------------------------------|--------------------------------|-------------------------------|
| <b>Δ Blood perfusion (%)</b>         |                                |                               |
| 0.5                                  | 0.12 (0.09–0.14) <sup>b</sup>  | 0.19 (0.14–0.25) <sup>b</sup> |
| 1                                    | 0.02 (−0.04–0.08)              | 0.07 (0.01–0.1) <sup>a</sup>  |
| 2                                    | −0.04±0.04                     | 0.01±0.03                     |
| 3                                    | −0.03±0.04                     | 0.01±0.01                     |
| 10                                   | 0.01±0.02                      | 0.03±0.04                     |
| 30                                   | 0.01±0.02                      | 0.03±0.04                     |
| 60                                   | 0.01±0.02                      | 0.03±0.04                     |
| <b>Δ Heart rate (bpm)</b>            |                                |                               |
| 0.5                                  | 48.0 (47.0–124.0) <sup>b</sup> | −9.0 (−14.0–0.0)              |
| 1                                    | 57.0 (40.0–107.0) <sup>b</sup> | −10.4±13.2                    |
| 2                                    | 41.2±17.3 <sup>c</sup>         | −7.6±16.9                     |
| 3                                    | 32.0 (20.0–56.0) <sup>b</sup>  | −8.0 (−21.0–7.0)              |
| 10                                   | 10.0±24.7                      | −6.0 (−17.0–49.0)             |
| 30                                   | 8.0 (−32.0–36.0)               | 5.8±22.3                      |
| 60                                   | 8.0 (−35.0–36.0)               | 4.6±21.6                      |
| <b>Δ Blood oxygen saturation (%)</b> |                                |                               |
| 0.5                                  | −5.0 (−27.0–0.0)               | 0.0 (−27.0–6.0)               |
| 1                                    | −2.0 (−37.0–0.0)               | −4.0 (−37.0–5.0)              |
| 2                                    | −12.8±4.4 <sup>a</sup>         | −7.6±5.7                      |
| 3                                    | −7.6±9.6                       | −3.2±7.4                      |
| 10                                   | 3.0 (−7.0–29.0)                | 8.0 (−7.0–10.0)               |
| 30                                   | 1.8±11.7                       | −3.0±6.7                      |
| 60                                   | 1.6±11.8                       | −4.8±6.1                      |

Data are median with range or mean ± SD (n = 5). Δ indicates the change in relation to the value at the 0 minute of the experiment in

the test group; T, time and min, minute.

<sup>a</sup>P<0.05, <sup>b</sup>P<0.01, <sup>c</sup>P<0.001 vs vehicle with Mann–Whitney test or the unpaired Student's t-test.

**Table S4.** Change of respiratory rate and peak CO<sub>2</sub> in anaesthetized rats after administration of drugs measured by the PhysioSuite Physiological Monitoring Modular System (Kent Scientific Corporation) separately.

| T (min)                          | Adrenaline 5 µg/kg   | Nitroglycerin 10 µg/kg        |
|----------------------------------|----------------------|-------------------------------|
| <b>Δ Respiratory rate (bpm)</b>  |                      |                               |
| 0.5                              | -3.0 (-30.0–5.0)     | 2.6±2.5                       |
| 1                                | -4.2±4.1             | 0.0±4.2                       |
| 2                                | 0.2±6.4              | 1.8±3.1                       |
| 3                                | 3.2±4.9              | 3.8±3.1                       |
| 10                               | 0.0 (0.0–7.0)        | 8.0 (-1.0–20.0)               |
| 30                               | -1.0 (-1.0–7.0)      | 10.0 (0.0–20.0)               |
| 60                               | -1.0 (-2.0–8.0)      | 9.0 (1.0–20.0)                |
| <b>Δ Peak CO<sub>2</sub> (%)</b> |                      |                               |
| 0.5                              | -0.04 (-1.89– -0.02) | -0.11 (-0.30– -0.08)          |
| 1                                | 0.04 (-0.21–0.33)    | <b>-0.11±0.07<sup>a</sup></b> |
| 2                                | 0.09 (-0.01–0.77)    | -0.06 (-0.12–0.05)            |
| 3                                | 0.02 (-0.76–0.53)    | -0.02±0.05                    |
| 10                               | -0.05±0.23           | -0.04±0.18                    |
| 30                               | -0.04±0.18           | -0.05±0.16                    |
| 60                               | -0.05±0.18           | -0.05±0.17                    |

Data are median with range or mean ± SD (n = 5). Δ indicates the change in relation to the value at the 0 minute of the experiment in the test group; T, time and min, minute.

<sup>a</sup>P<0.05, <sup>b</sup>P<0.01, <sup>c</sup>P<0.001 vs vehicle with Mann–Whitney test or the unpaired Student's t-test.

**Table S5.** The values of tested parameters at 0 minute of the experiment carried out with the use of two methods separately.

| Parameters                     | Vehicle              | Adrenaline         | Nitroglycerin       |
|--------------------------------|----------------------|--------------------|---------------------|
| Systolic blood pressure (bpm)  | 111.3 (82.6–142.9)   | 101.8 (90.3–135.8) | 125.0 (105.5–134.5) |
| Diastolic blood pressure (bpm) | 106.6 (77.3.0–138.9) | 95.4 (89.2–129.7)  | 118.5 (99.7–127.2)  |
| Mean blood pressure (bpm)      | 109.0 (80.3–141.0)   | 100.1 (89.8–132.9) | 121.9 (102.7–130.6) |
| Blood perfusion (%)            | 0.05 (0.04–0.11)     | 0.08 (0.05–0.14)   | 0.07 (0.03–0.08)    |
| Heart rate (bpm)               | 431 (366–445)        | 415 (351–443)      | 378 (338–484)       |
| Blood oxygen saturation (%)    | 88 (80–96)           | 86 (70–99)         | 87 (86–99)          |
| Respiratory rate (bpm)         | 69 (55–73)           | 69 (59–81)         | 63 (41–75)          |
| Peak CO <sub>2</sub> (%)       | 2.3 (1.7–2.8)        | 2.3 (1.8–3.1)      | 2.8 (2.0–2.9)       |

Data are median with range (n = 5).
